# Supplementary material for: Phylogenetic relationships within the Phyllidiidae (Opisthobranchia, Nudibranchia)
Source: PubMed Central journal article supplement (PMC4978068; doi:10.3897/zookeys.605.7136), 2016-07-14
Supplement: zookeys-605-001-s001.pdf [file zookeys-605-001-s001.pdf]

**Appendix.** COI sequences of Phyllidiidae specimens that dried out after sequencing (numbers and localities are indicated in Table 1.

**058 *Phyllidia elegans***

GGTCTTTTGGGAACAGGTTTAAGATTACTAATTCGTTTTGAGTTAGGGACTGCTGGGCCT  
TTTTTAGGAGATGACCATTTTTATAATGTTATTGTAACAGCTCATGCTTTTTGTAATAATT  
TTTTTTCTAGTTATGCCTTTAATAATTGGAGGATTTGGAACTGGATGGTTCCTTTACTA  
ATTGGAGCTCCTGATATAAGTTTTCTCGAATAAATAATATAAGGTTTTGATTACTTCCA  
CCATCTTTTATTTTATTGTTGTGTTCAACTTTAATAGAAGGTGGTGCCGGAACAGGATGG  
ACAGTTTACCCTCCTTTATCTGGTCCAATAAGACATGGTGGAACATCTGTGATTTAGTA  
ATTTTTCTTTACACTTAGCTGGAGCCTCTTCTCTTCTTGGAGCAATTAATTTTATTACT  
ACTATTTTAAATATGCGTTCACCTGCTATAACAATAGAACGTCTAAGGTTATTCGTTTGG  
TCTGTTTTGGTAACAGCTTTTTCTTTACTTCTTCTCTCCCTGTTCTGGCAGGAGCTATT  
ACTATACTTTTGACAGATCGAAATTTAATACAAGCTTTTTTGATCCAGCTGGTGGAGGA  
GAC

**137 *Phyllidia elegans***

GGTCTTTTGGGAACAGGTTTAAGATTACTAATTCGTTTTGAGTTAGGGACTGCTGGGCCT  
TTTTTAGGAGATGACCATTTTTATAATGTTATTGTAACAGCTCATGCTTTTTGTAATAATT  
TTTTTTCTAGTTATGCCTTTAATAATTGGAGGATTTGGAACTGGATGGTTCCTTTACTA  
ATTGGAGCTCCTGATATAAGTTTTCTCGAATAAATAATATAAGGTTTTGATTACTTCCA  
CCATCTTTTATTTTATTGTTGTGTTCAACTTTAATAGAAGGTGGTGCCGGAACAGGATGG  
ACAGTTTACCCTCCTTTATCTGGTCCAATAGGACATGGTGGAACATCTGTGATTTAGTA  
ATTTTTCTTTACATTTAGCTGGAGCCTCTTCTCTTCTTGGAGCAATTAATTTTATTACT  
ACTATTTTAAATATGCGTTCACCTGCTATAACAATAGAACGTCTAAGGTTATTCGTTTGG  
TCTGTTTTGGTAACAGCTTTTTCTTTGCTTCTTCTCTCCCTGTTCTGGCAGGAGCTATT  
ACTATACTTTTGACAGATCGAAATTTAATACAAGCTTTTTTGATCCAGCTGGTGGAGGA  
GAC

**156 *Phyllidia elegans***

GGTCTTTTGGGAACAGGTTTAAGATTACTAATTCGTTTTGAGTTAGGGACTGCTGGGCCT  
TTTTTAGGAGATGACCATTTTTATAATGTTATTGTAACAGCTCATGCTTTTTGTAATAATT  
TTTTTTCTAGTTATGCCTTTAATAATTGGAGGATTTGGAACTGGATGGTTCCTTTACTA  
ATTGGAGCTCCTGATATAAGTTTTCTCGAATAAATAATATAAGGTTTTGATTACTTCCA  
CCATCTTTTATTTTATTGTTGTGTTCAACTTTAATAGAAGGTGGTGCCGGAACAGGATGG  
ACAGTTTACCCTCCTTTATCTGGTCCAATAGGACATGGTGGAACATCTGTGATTTAGTA  
ATTTTTCTTTACATTTAGCTGGAGCCTCTTCTCTTCTTGGAGCAATTAATTTTATTACT  
ACTATTTTAAATATGCGTTCACCTGCTATAACAATAGAACGTCTAAGGTTATTCGTTTGG  
TCTGTTTTGGTAACAGCTTTTTCTTTGCTTCTTCTCTCCCTGTTCTGGCAGGAGCTATT  
ACTATACTTTTGACAGATCGAAATTTAATACAAGCTTTTTTGATCCAGCTGGTGGAGGA  
GAC

**074 *Phyllidia varicosa***

GGTCTTTTAGGAACAGGGTTAAGTTTGTAAATTCGTTTTGAATTAGGAACTGCTGGACCT  
TTTCTAGGAGATGACCATTTTTATAATGTGATTGTAACGGCTCATGCTTTTGTAAATAATT  
TTCTTTTATAGTTATACCTTTGATAATTGGGGGATTTGGTAACTGAATAGTCCCTTTATTA  
ATTGGAGCTCCAGATATAAGTTTCCCCGAATAAATAATATAAGTTTTTGGTACTTCCA  
CCCTCTTTTATTTTATTACTATGTTTCGACCTTGATAGAAGGTGGAGCCGGAACAGGATGG  
ACTGTTTACCCTCCATTATCCGGTTCAATAGGTCATGGGGGAACATCTGTTGATTTAGTA  
ATTTTTCTTTACACTTAGCAGGGGCTTCTTCTTTATTAGGAGCTATTAATTTCACTACT  
ACTATTTTTAATATACGTTTACCTGCTATAACAATGGAACGTTTAAGTTTATTTGTTTGA  
TCAGTTCTGGTGACTGCTTTCCTTTACTTCTTTCCTTACCAGTTTTGGCAGGAGCTATT  
ACTATACTTTTGACAGATCGTAATTTTAATACTAGATTTTTTGACCCAGCAGGTGGAGGA  
GAT

**75F *Phyllidiella pustulosa***

GGTTTATTAGGAACGGGATTAAGATTATTAATTCGTTTTGAGTTAGGTGCCGCTGGTGCT  
TTTTTGGGGGATGACCACTTTTATAATGTAATTGTGACTGCCCATGCTTTCGTTATAAATT  
TTTTTTTTGGTAATGCCTTTAATAATTGGAGGATTTGGAAATTGAATGGTACCTTTGTTA  
ATTGGGGCTCCARACATGAAATTTCTCGAATAAATAATATAARATTTTGGTTGTTGCC  
CCTTCGTTTATTCTTCTTTTATGCTCAACATTGATAGAGGGAGGGGCGGGGACAGGTTGA  
ACTGTCTATCCTCCTTATCTGGGGCAATAGGGCACGGAGGAACTTCAGTTGATCTTGCT  
ATTTTTCTCTTCATTTAGCTGGAGCTTCTTCTTACTGGGAGCAATTAATTTTACTACT  
ACTATTTTTAATATGCGATCTCCTGCGATGACAATARAACGATTAACCCTATTTGTTTGA  
TCTGTTCTAGTAACCGCTTCTTGTGCTTTTATCTCTTCCAGTATTAGCTGGGGCTATT  
ACTATGCTATTAACARATCGRAATTTTAATACGAGATTTTTTGACCCA
